# Supplementary material for: Dysnatremia, Aging, and Vulnerability: Mortality and Discharge Outcomes in Hospitalized Adults
Source: Research Square preprint supplement (doi:10.21203/rs.3.rs-8355025/v1), 2026-01-13
Supplement: Supplementary file 1 [file ea712e151bfa28b7a9bd8d3a.docx]

Additional File 1. Multivariable regression analysis of sodium abnormalities and in-hospital outcomes

1. **In-Hospital mortality (Adjusted odds ratios)**

| Predictor | aOR (95% CI) | P value |
| --- | --- | --- |
| Hyponatremia (vs normonatremia) | 3.50 (3.39–3.62) | <0.001 |
| Hypernatremia (vs normonatremia) | 14.55 (13.99–15.14) | <0.001 |
| Hyponatremia × Age ≥65 | 0.41 (0.40–0.43) | <0.001 |
| Hypernatremia × Age ≥65 | 0.38 (0.36–0.40) | <0.001 |
| Hyponatremia × Black | 0.99 (0.95–1.03) | 0.79 |
| Hypernatremia × Black | 0.81 (0.77–0.86) | <0.001 |
| Hyponatremia × Hispanic | 1.13 (1.08–1.19) | <0.001 |
| Hypernatremia × Hispanic | 1.21 (1.13–1.30) | <0.001 |
| Hyponatremia × Asian/Pacific Islander | 1.08 (1.00–1.17) | 0.045 |
| Hypernatremia × Asian/Pacific Islander | 1.12 (1.01–1.25) | 0.041 |
| Hyponatremia × Other race | 1.06 (0.98–1.14) | 0.10 |
| Hypernatremia × Other race | 0.97 (0.88–1.07) | 0.52 |

**B. SNF/LTAC discharge (Adjusted odds ratios)**

| Predictor | aOR (95% CI) | P value |
| --- | --- | --- |
| Hyponatremia (vs normonatremia) | 2.88 (2.82–2.94) | <0.001 |
| Hypernatremia (vs normonatremia) | 12.29 (11.82–12.79) | <0.001 |
| Hyponatremia × Age ≥65 | 0.50 (0.49–0.52) | <0.001 |
| Hypernatremia × Age ≥65 | 0.43 (0.41–0.45) | <0.001 |
| Hyponatremia × Black | 0.97 (0.95–0.99) | 0.026 |
| Hypernatremia × Black | 0.85 (0.82–0.88) | <0.001 |
| Hyponatremia × Hispanic | 1.05 (1.02–1.08) | <0.001 |
| Hypernatremia × Hispanic | 1.13 (1.07–1.19) | <0.001 |
| Hyponatremia × Asian/Pacific Islander | 0.99 (0.95–1.04) | 0.69 |
| Hypernatremia × Asian/Pacific Islander | 1.13 (1.04–1.23) | 0.004 |
| Hyponatremia × Other race | 1.05 (1.01–1.10) | 0.013 |
| Hypernatremia × Other race | 1.09 (1.02–1.17) | 0.025 |

**C. Hospitalization cost (% difference in total charges)**

| Predictor | % Difference (95% CI) | P value |
| --- | --- | --- |
| Hyponatremia (vs normonatremia) | +75.2% (73.9–76.5) | <0.001 |
| Hypernatremia (vs normonatremia) | +260.3% (248.8–272.4) | <0.001 |
| Hyponatremia × Age ≥65 | −34.5% (−35.6 to −33.4) | <0.001 |
| Hypernatremia × Age ≥65 | −50.1% (−52.1 to −48.0) | <0.001 |
| Hyponatremia × Black | +5.5% (3.7–7.3) | <0.001 |
| Hypernatremia × Black | −10.4% (−12.9 to −7.8) | <0.001 |
| Hyponatremia × Hispanic | +20.7% (18.7–22.7) | <0.001 |
| Hypernatremia × Hispanic | +19.0% (15.8–22.4) | <0.001 |
| Hyponatremia × Asian/Pacific Islander | +17.2% (14.2–20.3) | <0.001 |
| Hypernatremia × Asian/Pacific Islander | +27.3% (22.7–32.0) | <0.001 |
| Hyponatremia × Other race | +22.4% (19.1–25.9) | <0.001 |
| Hypernatremia × Other race | +23.1% (17.9–28.7) | <0.001 |

Additional file 1 shows multivariable regression analysis examining the association between (A) sodium abnormalities and in-hospital mortality; (B) discharge to skilled nursing or long-term acute care facilities; and hospitalization costs (C), with assessment of effect modification by age and race. Models are survey-weighted using the National Inpatient Sample sampling design. Odds ratios are derived from multivariable logistic regression models. Cost models use log-transformed total hospital charges and are reported as percentage differences. Interaction terms reflect sodium status × age group and sodium status × race. All models were adjusted for clinically relevant covariates; variables with collinearity or instability in interaction models were excluded from final specifications.
